# Supplementary material
Source: publisher site journal article supplement (https://www.dovepress.com/get_supplementary_file.php?f=432528.docx)
Supplement: Supplementary file 1 [file get_supplementary_file.php]

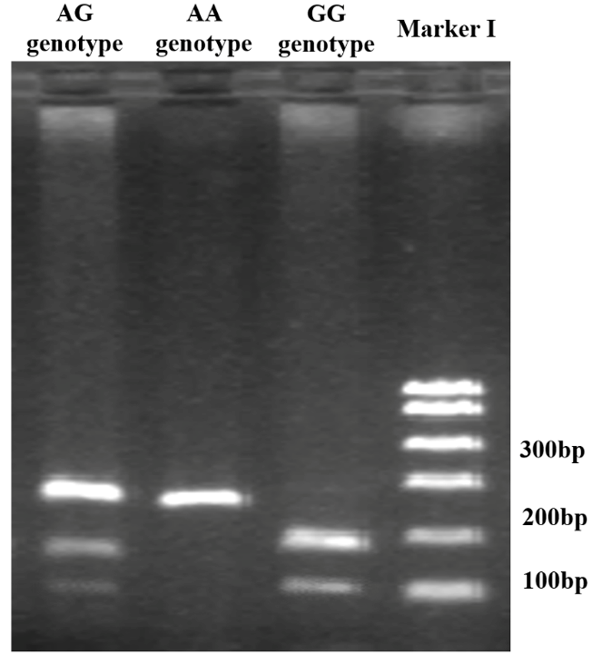


**Figure S1. Representative images of the bands produced from PCR-RFLP regarding the genotype status of rs2071559 in KDR gene**


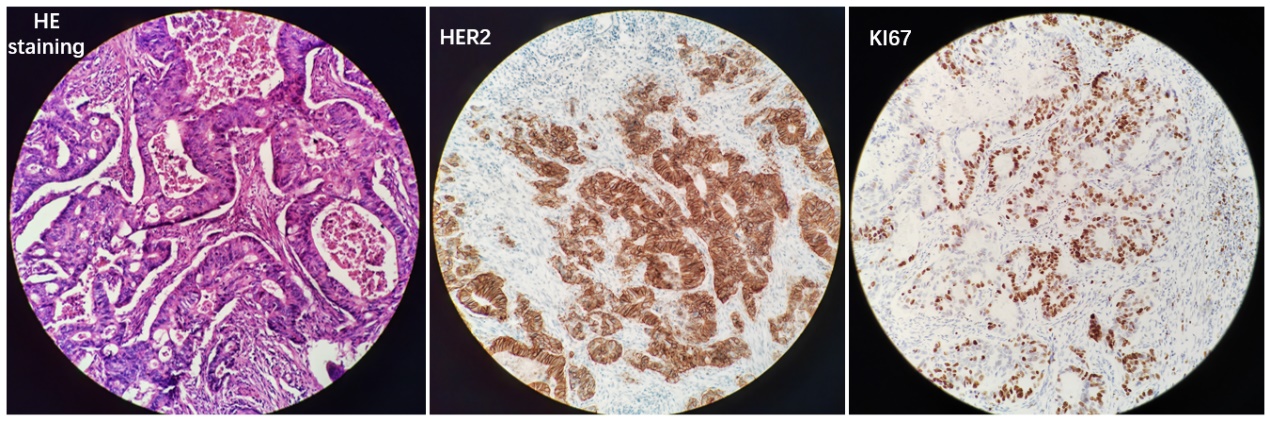


**Figure S2. HE staining and immunochemistry results of one patient with HER2 positive GC**


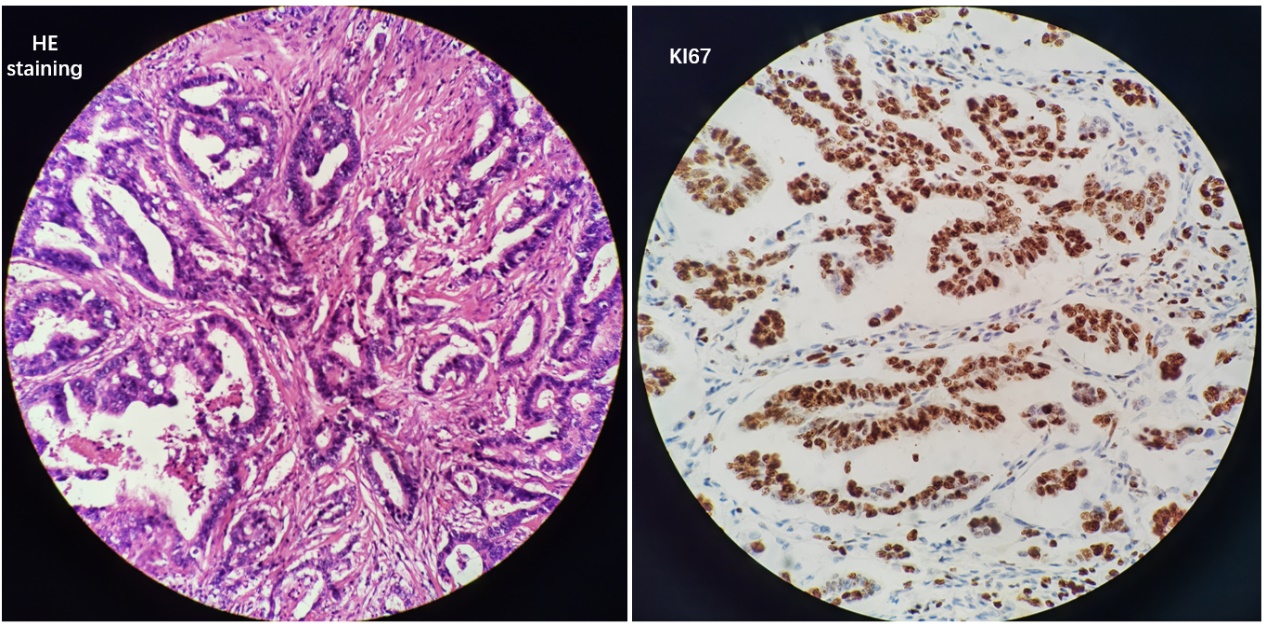


**Figure S3. HE staining and immunochemistry results of another one patient with KI67 positive GC**

**Table S1. The subsequent treatment of 169 patients with gastric cancer when relapsed and association analysis for rs2071559 genotype status in KDR**

| **Subsequent treatment** | **Total**  **(N=169, %)** | **Rs2071559 genotype status** | | ***χ2*** | ***P*** |
| --- | --- | --- | --- | --- | --- |
| **AA (N=104)** | **AG/GG (N=65)** |
| **Yes**  **No** | 79 (46.7)  90 (53.3) | 47 (45.2)  57 (54.8) | 32 (49.2)  33 (50.8) | 0.262 | 0.609 |
| **Subsequent regimens**  **chemotherapy**  **PD-1/PD-L1-related regimens**  **Traditional Chinese medicine**  **Anti-angiogenesis-related regimens**  **NA** | **79**  31 (39.2)  23 (29.1)  12 (15.2)  8 (10.1)  5 (6.3) | **AA (N=47)**  19 (40.4)  13 (27.7)  7 (14.9)  5 (10.6)  3 (6.4) | **AG/GG (N=32)**  12 (37.5)  10 (31.3)  5 (15.6)  3 (9.4)  2 (6.3) | 0.068  0.119  0.008  0.033  0.001 | 0.794  0.730  0.929  0.855  0.981 |

**Table S2. Correlation analysis between rs2071559 genotype status and adverse reactions of S-1 based adjuvant chemotherapy**

| **Adverse reactions** | **Total (N=169)** | **Rs2071559 genotype status** | | ***χ2*** | ***P*** |
| --- | --- | --- | --- | --- | --- |
| **AA (N=104)** | **AG/GG (N=65)** |
| Any adverse reactions | 88 (52.1) | 53 (51.0) | 35 (53.8) | 0.133 | 0.715 |
| Grade ≥3 adverse reactions | 43 (25.4) | 27 (25.9) | 16 (24.6) | 0.038 | 0.845 |
| Hematological toxicity | 61 (36.1) | 38 (36.5) | 23 (35.4) | 0.023 | 0.879 |
| Fatigue | 49 (29.0) | 31 (29.8) | 18 (27.7) | 0.087 | 0.768 |
| Nausea and vomiting | 41 (24.3) | 24 (23.1) | 17 (26.2) | 0.206 | 0.650 |
| Neuropathy | 28 (16.5) | 18 (17.3) | 10 (15.4) | 0.107 | 0.744 |
| Hepatotoxicity | 18 (10.7) | 12 (11.5) | 6 (9.2) | 0.224 | 0.636 |
